# Supplementary material for: Post-coronavirus disease 2019 functional impairments, limitations, and restrictions: A prospective cohort study based on the international classification of functioning, disability, and health
Source: PubMed Central journal article supplement — J Cent Nerv Syst Dis. 2023 Aug 19;15:11795735231195759. doi: 10.1177/11795735231195759 (PMC10655659; doi:10.1177/11795735231195759), 2023-08-19
Supplement: sj-pdf-1-cns-10.1177_11795735231195759.pdf [file sj-pdf-1-cns-10.1177_11795735231195759.pdf]

## Supplemental file 1. ICF components and domains/chapters used in this study

### Body Function:

Mental functions

Sensory functions and pain

Voice and speech functions

Functions of the cardiovascular, haematological, immunological and respiratory systems

Functions of the digestive, metabolic, endocrine systems Genitourinary and reproductive functions

Neuromusculoskeletal and movement-related functions Functions of the skin and related structures

### Body Structure:

Structure of the nervous system

The eye, ear and related structures

Structures involved in voice and speech

Structure of the cardiovascular, immunological and respiratory Systems

Structures related to the digestive, metabolic and endocrine systems

Structure related to genitourinary and reproductive systems Structures related to movement

Skin and related structures

### Activities and Participation:

Learning and applying knowledge General tasks and demands Communication

Mobility

Self-care

Domestic life

Interpersonal interactions and relationships Major life areas

Community, social and civic life

Comment [PR1]:

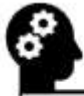

s,b

### ICF classification (6-12 months)

p<0,05 compared to 0-3 months

d

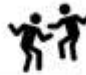

|                                 |                                             |
|---------------------------------|---------------------------------------------|
| b130 Energy and drive functions | d110 Watching                               |
| b140 Attention                  | d220 Undertaking multiple tasks             |
| b144 Memory                     | d440 Fine hand use                          |
| b152 Emotional functions        | d450 Walking                                |
| b210 Seeing                     | d470 Using transportation                   |
| b280 Pain                       | d475 Driving                                |
| b440 Respiration                | d7* Personal interactions and relationships |
| b530 Weight maintenance         |                                             |
| b730 Muscle power               |                                             |
| b735 Muscle tone                | * Grouped                                   |
| s410 Cardiovascular system      |                                             |
